# Supplementary material
Source: Springer Nature journal article supplement (https://www.springermedizin.de/resource/supplementary/12916_2012_592_MOESM6_ESM.pdf/9597912)

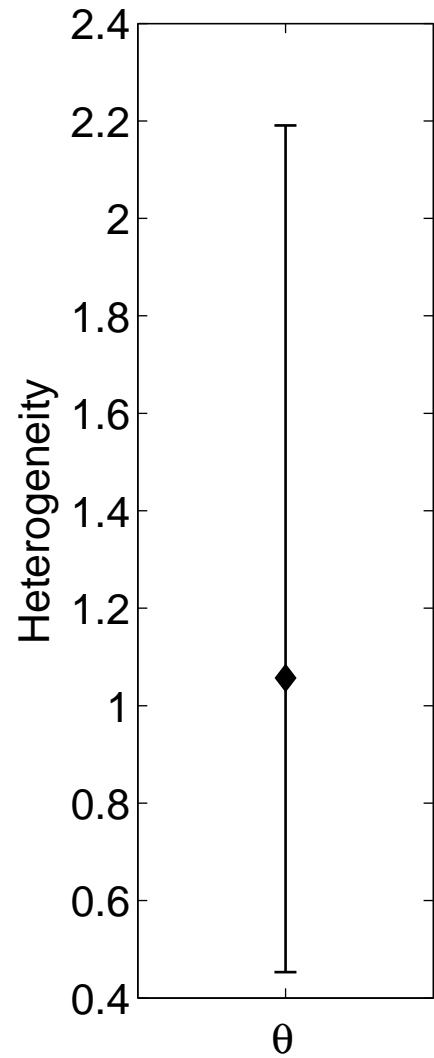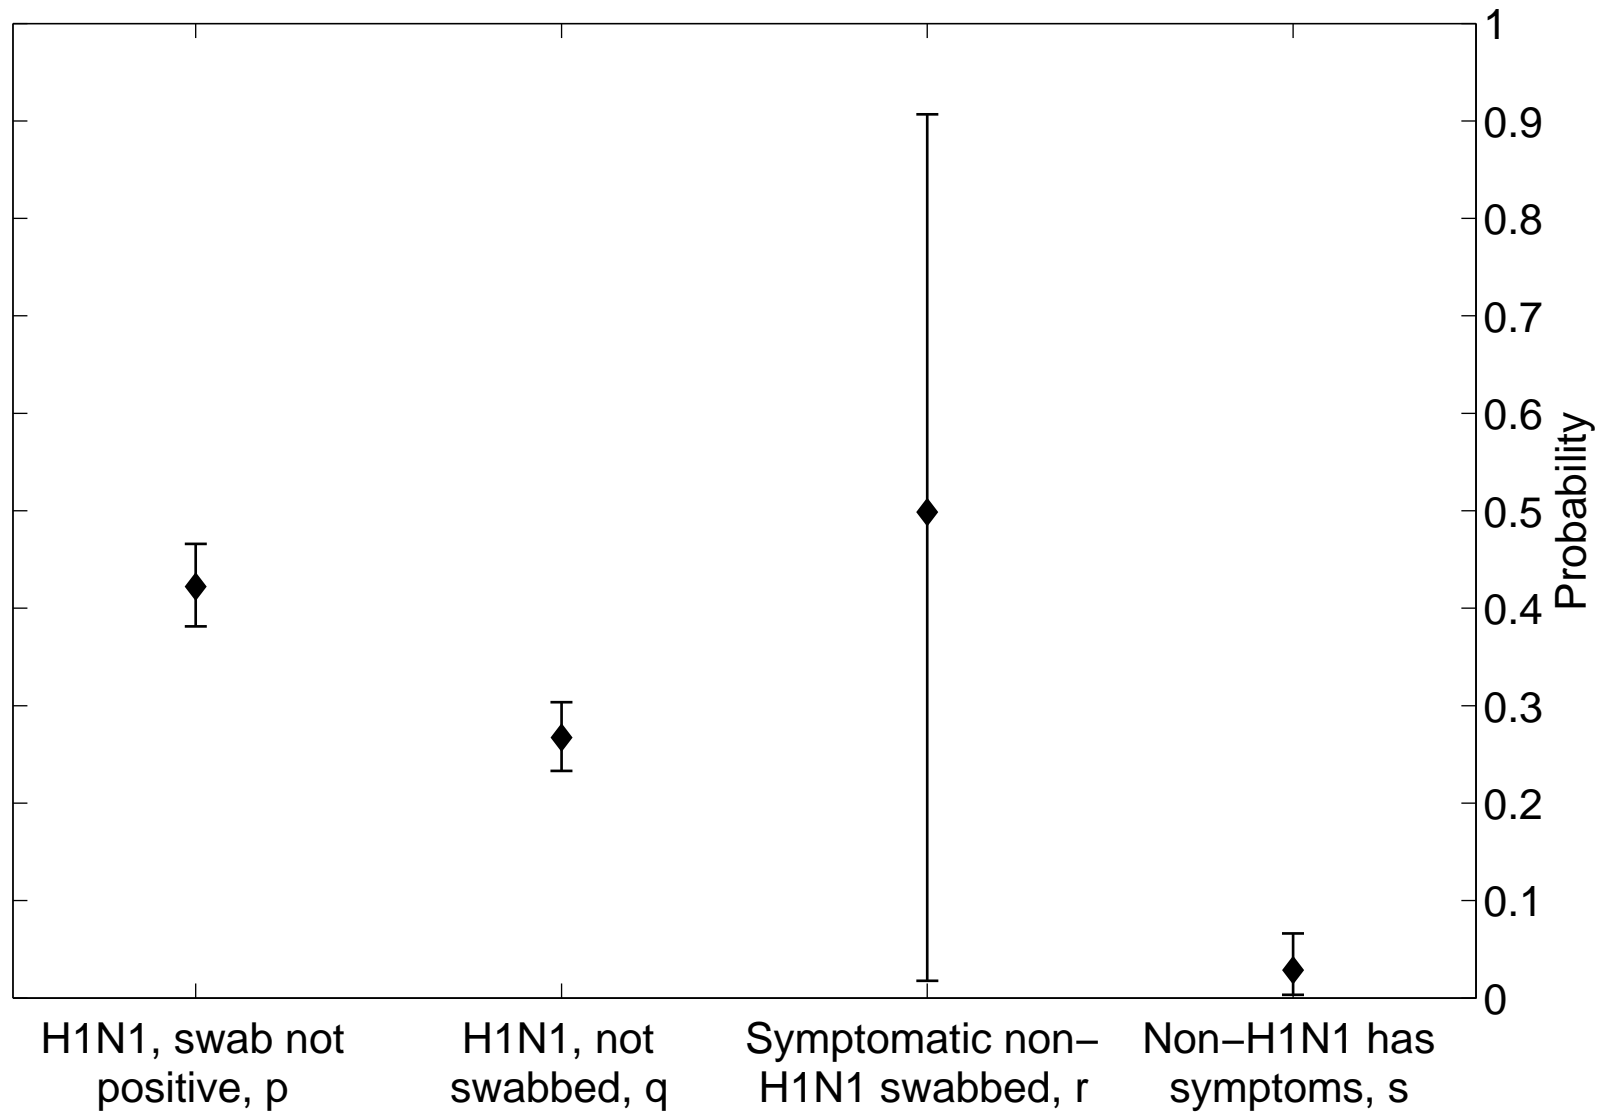

Supplement: MOESM6 [file 9597912]
